1 **Hyperinsulinemia promotes aberrant histone acetylation in triple negative breast cancer**

2

3 Parijat Senapati<sup>1</sup>, Christine Thai<sup>3</sup>, Angelica Sanchez<sup>3</sup>, Emily J Gallagher<sup>4</sup>, Derek LeRoith<sup>4</sup>,  
4 Victoria L. Seewaldt<sup>2,3</sup>, David K. Ann<sup>1,2</sup>, Dustin E. Schones<sup>1,2,\*</sup>

5

6 <sup>1</sup>Department of Diabetes Complications and Metabolism, Beckman Research Institute, City of  
7 Hope, Duarte, CA, USA

8 <sup>2</sup>Irell & Manella Graduate School of Biological Sciences, City of Hope, Duarte, CA, USA

9 <sup>3</sup>Department of Population Sciences and Beckman Institute, City of Hope, 1500 East Duarte  
10 Rd., Duarte, CA, 91010, USA

11 <sup>4</sup>Division of Endocrinology, Diabetes and Bone Diseases, Icahn School of Medicine at Mount  
12 Sinai, New York, NY

13

14

15 \*Corresponding Author:

16 Dustin E. Schones (dschones@coh.org)

17

18

19 Dustin Schones, Ph.D.

20 Department of Diabetes Complications and Metabolism

21 City of Hope

22 Duarte, CA, 91010

23 Email: dschones@coh.org

24 Phone: 626-218-1319

25

26

27

## 28 **Abstract (150 words)**

29 Excess levels of insulin relative to glucose in the blood, or hyperinsulinemia, is  
30 considered to be a poor prognostic indicator for patients with triple negative breast  
31 cancer (TNBC). While this association has been recognized for some time, the  
32 mechanistic role of hyperinsulinemia in promoting TNBC remains unclear. We show that  
33 insulin treatment leads to genome-wide increase in histone acetylation, in particular at  
34 H3K9, through the PI3K/AKT/mTOR pathway in MDA-MB-231 cells. Genome-wide  
35 analysis showed that the increase in histone acetylation occurs primarily at gene  
36 promoters. In addition, insulin induces higher levels of reactive oxygen species and  
37 DNA damage foci in cells. *In vivo*, hyperinsulinemia also enhances growth of MDA-MB-  
38 231 derived tumors through increased histone acetylation. These results demonstrate  
39 the impact of hyperinsulinemia on altered gene regulation through chromatin and the  
40 importance of targeting hyperinsulinemia-induced processes that lead to chromatin  
41 dysfunction in TNBC.

42

## 43 **Introduction**

44 Triple negative breast cancer (TNBC) is a clinically aggressive subtype of breast cancer  
45 that does not express estrogen receptor (ER), progesterone receptor (PR) or human  
46 epidermal growth factor receptor 2 (HER2) (Carey, Winer, Viale, Cameron, & Gianni,  
47 2010). Recent epidemiological studies suggest that metabolic syndrome and associated  
48 disorders are additional risk factors for developing TNBC in premenopausal women  
49 (Pierobon & Frankenfeld, 2013). Multiple factors common to metabolic syndrome,  
50 including hyperinsulinemia, hyperglycemia, hyperlipidemia, altered adiponectin and  
51 leptin levels can contribute to promote tumor growth and progression (Hursting et al.,  
52 2012). However, it has been shown that hyperinsulinemia alone even in the absence of  
53 obesity and T2D is also associated with increased breast cancer incidence (Del Giudice  
54 et al., 1998; Gunter et al., 2009; Lawlor, Smith, & Ebrahim, 2004; Lipscombe, Goodwin,  
55 Zinman, McLaughlin, & Hux, 2006) and adverse prognosis (Goodwin et al., 2002;  
56 Goodwin et al., 2012).

57 Hyperinsulinemia can influence tumor growth by multiple mechanisms. Insulin can  
58 stimulate tumor cell survival and proliferation by signaling through the insulin receptor  
59 (IR) (Belfiore, Frasca, Pandini, Sciacca, & Vigneri, 2009; Huang et al., 2011) as well as  
60 by enhancing the available pool of insulin-like growth factor (IGF-I) by decreasing the  
61 expression of IGF binding protein (IGFBP1) (Calle & Kaaks, 2004). Increased IR  
62 expression and the presence of phosphorylated IR/IGF-IR in breast cancer are  
63 associated with poor prognosis and decreased survival (Belfiore et al., 1996; Mathieu,  
64 Clark, Allred, Goldfine, & Vigneri, 1997). Interestingly, in a mouse model of  
65 hyperinsulinemia without confounding factors such as obesity, hyperglycemia or  
66 hyperlipidemia (Novosyadlyy et al., 2010), endogenous hyperinsulinemia increases  
67 mammary tumor growth as well as metastases (Ferguson et al., 2012) by signaling  
68 primarily through the IR (Gallagher et al., 2013; Novosyadlyy et al., 2010).

69 Insulin binding to IR leads to downstream activation of PI3K-AKT and MAPK signaling  
70 pathways (Saltiel & Kahn, 2001). The PI3K-AKT pathway has oncogenic activity and  
71 induces mTOR signaling that promotes cell growth (Engelman, Luo, & Cantley, 2006;  
72 Manning & Cantley, 2007). Breast cancers frequently show deregulation of the PI3K-  
73 AKT and mTOR pathway (Campbell et al., 2004; Guertin & Sabatini, 2007; Hynes &  
74 Boulay, 2006; Vivanco & Sawyers, 2002). Moreover, activation of AKT/mTOR signaling  
75 is associated with poor prognosis in TNBCs (Ueng et al., 2012). Since insulin can  
76 activate the AKT/mTOR pathway, it is predicted that hyperinsulinemia may drive the  
77 aggressive biology of TNBCs in women with insulin resistance and TNBCs. Additionally,  
78 mTOR signaling stimulates mitochondrial biogenesis and activity thereby enhancing  
79 mitochondrial processes such as TCA cycle, oxidative phosphorylation and ATP  
80 production (Morita et al., 2013). Cancer cells exhibit enhanced utilization of glucose  
81 which is further converted to citrate by the TCA cycle. In proliferating cancer cells,  
82 citrate is converted to acetyl-coenzyme A (acetyl-CoA) that is utilized for production of  
83 lipids (Vander Heiden, Cantley, & Thompson, 2009). Acetyl-CoA is also utilized by  
84 nuclear histone acetyltransferases as a substrate for histone acetylation, which is an  
85 important mechanism for regulating cellular gene expression by aiding in the  
86 accessibility of chromatin through several mechanisms (Di Cerbo & Schneider, 2013;  
87 Su, Wellen, & Rabinowitz, 2016). Cancer cells often exhibit deregulation of histone

88 acetylation (Di Cerbo & Schneider, 2013). Although several studies indicate the role of  
89 insulin signaling in breast cancer, the mechanistic details of these cellular processes in  
90 promoting TNBCs is lacking. Most importantly, the effect of hyperinsulinemia on  
91 chromatin and gene expression in the nucleus is unclear.

92 We report here an investigation into the impact of hyperinsulinemia on chromatin  
93 acetylation by profiling histone H3 acetylation at lysine 9 (H3K9ac) after insulin  
94 treatment of the triple negative breast cancer cell line MDA-MB-231. We show that  
95 insulin induces global increases in histone acetylation through the PI3K/AKT/mTOR  
96 pathway. We used quantitative ChIP-seq analyses (ChIP-Rx) to show that gene  
97 promoters exhibit the greatest increases in histone acetylation. In addition, insulin  
98 induces DNA damage in cells through enhanced reactive oxygen species (ROS)  
99 production and increased chromatin accessibility. Moreover, increased insulin levels  
100 enhance growth of MDA-MB-231 xenograft tumors through enhanced histone  
101 acetylation. These findings suggest that hyperinsulinemia leads to altered cell  
102 metabolism that influences chromatin acetylation in tumor cells, thereby influencing  
103 gene expression across the genome.

104

## 105 **Results**

### 106 **Insulin induces genome-wide histone acetylation in MDA-MB-231 cells.**

107 To investigate the effect of insulin on chromatin, we treated MDA-MB-231 cells with  
108 100nM insulin for different durations and assayed the levels of histone acetylation via  
109 western blot. We observed an increase in total histone H3 acetylation levels (acH3)  
110 after 3h of insulin treatment (Figure 1A). This increase was more pronounced for  
111 specific residues such as H3K9 and H3K14 (Figure 1A). To confirm that the PI3K-AKT  
112 pathway was activated by insulin, we further probed the blots with phospho-AKT  
113 antibody. Phospho-AKT levels were induced at higher levels after 1h of insulin  
114 treatment, after which the signal was attenuated, as expected (Figure 1A). To assess  
115 the role of PI3K-AKT/mTOR pathway activation in increasing histone acetylation levels,  
116 we used inhibitors targeting mTOR and PI3K kinases. We pre-treated MDA-MB-231  
117 cells with mTOR inhibitor rapamycin and PI3K inhibitor LY294002 followed by insulin

118 treatment. Insulin induced phosphorylation of AKT and p70 S6 kinase (S6K), an mTOR  
119 kinase substrate, in rapamycin untreated cells (Figure 1B, lanes 1 and 2). Rapamycin  
120 pre-treatment, however, inhibited the phosphorylation of S6K without affecting AKT  
121 phosphorylation confirming that rapamycin indeed inhibited mTOR kinase activity  
122 (Figure 1B, lanes 3 and 4). Both mTOR inhibition and PI3K inhibition, by rapamycin and  
123 LY294002 treatment respectively, inhibited the H3K9ac increase induced by insulin  
124 (Figure 1B and 1C). To confirm that the insulin induced histone H3 acetylation is  
125 chromatin-bound and not on newly synthesized or free histones, we performed  
126 chromatin fractionation after insulin treatment followed by western blot analyses.  
127 Results showed that insulin induced H3K9ac was exclusively chromatin bound (Figure  
128 S1A-B).

129 mTOR complex 1 (mTORC1) enhances mitochondrial biogenesis and activity by  
130 promoting translation of nuclear encoded mitochondrial mRNAs including the  
131 components of Complex V and TFAM (transcription factor A, mitochondrial) (Morita et  
132 al., 2013). To test whether insulin induced histone acetylation increase was correlated  
133 with enhanced mitochondrial activity, we performed western blot analyses for TFAM and  
134 ATP5D (a subunit of the ATP synthase complex/Complex V) after insulin treatment.  
135 TFAM and ATP5D protein levels increase after 1h insulin treatment (Figure 1D). Next,  
136 we tested indicators of mitochondrial biogenesis and activity after insulin treatment.  
137 Mitochondrial DNA content is an indicator of mitochondrial number and ATP levels are a  
138 measure of mitochondrial activity in cells (Morita et al., 2013). Insulin increased the  
139 mitochondrial DNA content (Figure 1E) as well as ATP levels (Figure 1F) in MDA-MB-  
140 231 cells, indicating an enhancement in mitochondrial biogenesis and activity. In  
141 addition, we performed GC-MS to measure TCA cycle metabolites produced in the  
142 mitochondria. We observed increased levels of lactate and TCA cycle intermediates  
143 succinate, pyruvate, alpha-ketoglutarate, malate and citrate after 6h of insulin treatment  
144 (Figure S1C). These data suggest that insulin induces genome-wide increase in histone  
145 acetylation, in particular H3K9ac, through the PI3K-AKT-mTOR pathway.

146 **Insulin induces H3K9ac acetylation on promoter regions.**

147 To characterize the genomic loci associated with increased histone acetylation after  
148 insulin treatment, we performed quantitative ChIP-seq analyses as described in  
149 (Orlando et al., 2014) where we spiked in *Drosophila* S2 cells with MDA-MB-231 cells  
150 before the chromatin immunoprecipitation (ChIP) (see Methods). We observed an  
151 increase in the number of reads aligning to the human genome in the 3h and 6h insulin  
152 treated H3K9ac ChIPs indicating an increase in global histone acetylation levels (Table  
153 S1). By performing spike normalization (see Methods, Figure S2A-F), we observed  
154 global increases in H3K9ac levels on peaks in 3h and 6h insulin treated cells (Figure  
155 S2A-F).

156 Next, we annotated the H3K9ac peaks based on distance to the nearest RefSeq  
157 annotated TSS. Results showed that ~46% of the H3K9ac peaks were promoter  
158 proximal (~26% within 1kb and ~20% between 1kb-10kb of nearest TSS) (Figure 2A).  
159 We used DESeq2 (Love, Huber, & Anders, 2014) to identify peaks that were  
160 significantly increased (adjusted  $P < 0.05$ ) in both 3h and 6h insulin treated cells  
161 compared to UT. 22,372 and 9,171 peaks were significantly enriched with H3K9ac in 3h  
162 and 6h insulin treated cells respectively (Figure 2B and C). Of the significantly enriched  
163 peaks, about 58% and 55% of the peaks were promoter proximal (Figure 2A) in 3h and  
164 6h samples respectively indicating that increases in H3K9ac were majorly localized at  
165 promoter regions and could potentially influence gene expression. Heat maps of  
166 H3K9ac at  $\pm 2$ kb around annotated start sites of transcripts further confirmed the  
167 increase in H3K9ac signal at promoter regions in insulin treated cells. There was a  
168 higher enrichment of H3K9ac signals at promoters in 3h compared to 6h treated cells  
169 (Figure S3). The highly enriched H3K9ac peaks had significant increases in H3K9ac  
170 signal at promoter regions ( $\pm 1$ kb from TSS) of their nearest genes (Figure 2D and E).  
171 These results show that insulin induces genome-wide increase in H3K9ac at promoter  
172 regions of genes and thereby could be involved in transcriptional regulation.

### 173 **Insulin induces H3K9ac acetylation on promoters of insulin-induced genes.**

174 To further test whether the increase in H3K9ac enrichment levels correlate with gene  
175 expression changes induced by insulin, we performed RNA-sequencing (RNA-seq) in  
176 MDA-MB-231 cells untreated (UT) or treated for 3h and 6h with insulin. We quantified

177 changes in gene expression after 3h and 6h insulin treatment from RNA-seq data using  
178 DESeq2 (Love et al., 2014). 207 and 384 genes exhibited significantly altered  
179 expression in in 3h and 6h insulin treated cells respectively (Figure 3A and 3B). Insulin  
180 treatment induced metabolic pathways required for cellular growth such as ribosome  
181 biogenesis, transcription, and splicing as well as known insulin regulated downstream  
182 pathways related to ATP production and mTOR signaling (Figure 3C). Insulin treatment  
183 downregulated FOXO signaling genes as well as apoptosis inducing genes.  
184 Interestingly, insulin treatment also downregulated genes involved in reactive oxygen  
185 species (ROS) metabolism or scavenging as well as immune cell migration and  
186 activation. Moreover, insulin upregulated several MYC (c-Myc) target genes and genes  
187 related to zinc ion homeostasis in cells (Figure 3C). These results indicate that insulin  
188 induces cell growth and proliferation while also suppressing apoptosis.

189 We then compared the changes in H3K9ac enrichment on the promoter regions (TSS  
190  $\pm 1$ kb) of genes upregulated and downregulated by insulin. Upregulated genes showed a  
191 larger increase in H3K9ac enrichment induced by insulin (Figure 3E and 3G) at 3h and  
192 6h respectively. However, genes downregulated at 3h also showed a modest but  
193 significant increase in H3K9ac enrichment at their promoters (Figure 3F). Interestingly,  
194 genes downregulated after 6h insulin treatment did not show any significant enrichment  
195 in H3K9ac signals (Figure 3H). These results indicate that there is a genome-wide  
196 increase in H3K9ac signal at all expressed genes after 3h insulin treatment. However,  
197 at 6h the increase in H3K9ac signal is more specific to upregulated genes.  
198 Representative examples show the increase in H3K9ac enrichment on the upregulated  
199 gene *TMEM201* (Figure 3I) and no change in H3K9ac signal on the promoter of  
200 *GABARAPL1* (Figure 3J), a downregulated gene. These results indicate that the gene  
201 expression changes observed after insulin treatment are specific and are likely induced  
202 by signal-dependent transcription factors. Genome-wide increase in H3K9ac at  
203 promoters may facilitate increased chromatin accessibility at regulatory regions,  
204 however, is not enough to activate transcription which depend on recruitment of  
205 transcription factors, co-activators and RNA Polymerase II.

206 **Transcription factor NRF1 is involved in insulin mediated gene expression**  
207 **changes and histone acetylation.**



208 In order to further characterize the signal-dependent transcription factors involved in the  
209 altered gene expression network as well as chromatin acetylation induced by insulin, we  
210 performed transcription factor binding motif enrichment analyses. Genes upregulated by  
211 insulin showed a significant enrichment of E-box elements that are bound by  
212 transcription factors such as MYC (c-Myc), CLOCK, USF1, and BHLHE40 (Figure 4A).  
213 In addition to E-box elements, binding motifs for NRF1, ELF1, ELK1 and E2F  
214 transcription factors were also enriched. Interestingly, MYC target genes were also  
215 enriched in the upregulated gene set (Figure 3C), further implicating the involvement of  
216 MYC in enhancing expression of genes in response to insulin. Moreover, PI3K/AKT and  
217 MAPK pathways induced by insulin are known to enhance MYC activity by promoting  
218 the degradation of MAD1, an antagonist of MYC (Zhu, Blenis, & Yuan, 2008). We then  
219 categorized peaks with significantly increased H3K9ac signals based on distance from  
220 TSS of known RefSeq genes. We defined proximal peaks as peaks within 10kb of a  
221 known TSS and distal peaks as those outside this window. Proximal peaks with  
222 increased H3K9ac signals showed enrichment of transcription factor binding motifs for  
223 SP1, NRF1, ATF3, ELK1 and AP1 transcription factors among others (Figure 4B). Distal  
224 peaks that exhibited increased H3K9ac signal in response to insulin showed enrichment  
225 of FOS, JUN and AP1 family transcription factor binding sites (Figure 4C). NRF1  
226 (Nuclear Respiratory factor 1) is required for expression of key metabolic genes  
227 regulating cellular growth. NRF1 also regulates the expression of several nuclear-  
228 encoded mitochondrial genes (Witkiewicz et al., 2011). As we earlier observed  
229 increased protein levels of mitochondrial proteins TFAM and ATP5D in response to  
230 insulin (Figure 1D), we tested whether NRF1 enrichment at its binding sites were  
231 enhanced after insulin treatment. ChIP experiments showed that NRF1 binding indeed  
232 increased after 3h insulin treatment at promoters of upregulated genes (Figure 4D-K).  
233 Increased NRF1 binding was also observed 6h post-insulin treatment, however, it was  
234 lower than that at 3h (Figure 4D-K) indicating an early response to insulin. NRF1  
235 binding at promoters of NRF1 target genes could lead to increased histone acetylation  
236 at these regions. These results indicate that NRF1 might regulate the metabolic  
237 capacity of cancer cells by integrating metabolic inputs from the environment to



238 increase histone acetylation on chromatin that allow continuous transcription from these  
239 genes.

240 **Insulin induced reactive oxygen species (ROS) causes genome instability.**

241 mTOR pathway induces mitochondrial biogenesis and activity that might lead to  
242 increased ROS production through the electron transport chain. To investigate whether  
243 insulin treatment induces ROS production in the cells, we measured ROS using a  
244 fluorescent dye, CellROX green. Results showed that ROS was significantly increased  
245 after 3h of insulin treatment and remained high at 6h (Figure 5A). Increase in ROS  
246 production could be deleterious to cells as the free radicals could cause DNA damage  
247 and mutation. We measured DNA damage using the DNA damage marker  $\gamma$ -H2AX in  
248 cells treated with insulin using immunofluorescence assays. We observed that the  
249 number of cells with  $\gamma$ -H2AX foci and the number of  $\gamma$ -H2AX foci per cell increased after  
250 3h insulin treatment (Figure 5B). Interestingly, the number of cells with  $\gamma$ -H2AX foci  
251 decreased after 6h indicating possible activation of repair pathways (Figure 5B) as  
252 MDA-MB-231 cells harbor wild type *BRCA1*. To investigate whether hyperinsulinemia  
253 was associated with increase in histone acetylation and DNA damage in human  
254 samples, we measured the levels of H3K9ac and  $\gamma$ -H2AX in peripheral blood  
255 mononuclear cells (PBMCs) from an insulin-resistant and a healthy individual. We  
256 observed increased levels of H3K9ac and  $\gamma$ -H2AX in the insulin-resistant individual as  
257 compared to the insulin-sensitive individual (Figure 5C) corroborating our *in vitro* results.  
258 To investigate whether insulin induced chromatin changes can be reversed, we used  
259 metformin, a drug that is used for treatment of pre-diabetes and diabetes (Hostalek,  
260 Gwilt, & Hildemann, 2015). Metformin improves insulin sensitivity by several  
261 mechanisms, including mitochondrial Complex I inhibition and AMP kinase activation  
262 (Hur & Lee, 2015). Pre-treatment of cells with metformin prevented the insulin-induced  
263 increase in H3K9 acetylation (Figure 5D) indicating the potential significance of using  
264 metformin in triple negative breast cancer patients with hyperinsulinemia in preventing  
265 insulin mediated chromatin changes. Overall these data suggest that hyperinsulinemia  
266 might sensitize cells to DNA damage through increased ROS production and increased

267 chromatin accessibility thereby potentially promoting deleterious mutations in pre-  
268 neoplastic lesions.

### 269 **Hyperinsulinemia enhances tumor growth in mice.**

270 To further demonstrate the role of hyperinsulinemia in enhanced tumor progression  
271 through altered chromatin acetylation, we used an immunodeficient hyperinsulinemic  
272 mouse model, *Rag1*<sup>-/-</sup>/*MKR*<sup>+/+</sup> (Zelenko et al., 2016). MKR mice (Novosyadlyy et al.,  
273 2010) harbor a dominant negative mutation in the IGF-IR expressed specifically in the  
274 skeletal muscle. The female *Rag1*<sup>-/-</sup>/*MKR*<sup>+/+</sup> mice develop hyperinsulinemia but do not  
275 exhibit obesity, hyperglycemia or dyslipidemia. Orthotopic tumor xenografts were  
276 performed in *Rag1*<sup>-/-</sup>/*MKR*<sup>+/+</sup> (*Rag*/*MKR*) mice and *Rag1*<sup>-/-</sup> (*Rag*/*WT*) female mice using  
277 MDA-MB-231 cells, as previously described (Shlomai et al., 2017). Tumors derived from  
278 the *Rag*/*MKR* mice were significantly larger and weighed more than those derived from  
279 the *MKR* tumors as shown earlier (Shlomai et al., 2017). To investigate whether tumors  
280 from hyperinsulinemic (*MKR*) showed increased histone acetylation, we performed  
281 western blot analysis on tumor protein extracts from *Rag*/*WT* or *Rag*/*MKR* mice. Results  
282 show a general trend towards increased histone acetylation in tumors from *MKR* mice  
283 (Figure 6C). To investigate the transcriptome changes associated with increased tumor  
284 growth in *Rag*/*MKR* mice, we performed RNA-seq analyses from two tumors each from  
285 *Rag*/*WT* and *Rag*/*MKR* mice. The MDA-MB-231 tumors derived from *Rag*/*WT* mice  
286 showed a completely different transcriptome compared to MDA-MB-231 cells grown in  
287 culture (data not shown) possibly due to differences in the microenvironment in the *in*  
288 *vitro* versus *in vivo* grown cells. The MDA-MB-231 tumors grown in *Rag*/*MKR* mice  
289 showed enhanced expression of genes related to collagen biosynthesis, extracellular  
290 matrix organization, cellular chemotaxis and interferon signaling (Figure 6D). Moreover,  
291 tumors grown under hyperinsulinemia showed decreased expression of FAS signaling,  
292 cell cycle and DNA damage checkpoint genes as well as genes that negatively regulate  
293 autophagy and PI3K-AKT signaling (Figure 6E). We also validated a few upregulated  
294 and downregulated genes from more tumors from each group by RT-qPCR to confirm  
295 the RNA-seq results (Figure 6F-I).

296 The gene expression changes induced by insulin in MDA-MB-231 cells cultured in vitro  
297 were not exactly mirrored by the gene expression changes in tumor xenografts in  
298 hyperinsulinemic mice. This observation is likely due to the fact that the MDA-MB-231  
299 cells grown in vitro showed very different gene expression profiles as compared to the  
300 MDA-MB-231 tumors grown in Rag/WT mice. This is consistent with previous results  
301 demonstrating that breast cancer cells grown in a monolayer behave differently than  
302 those grown in a 3D microenvironment (Edmondson, Broglie, Adcock, & Yang, 2014).  
303 Moreover, the insulin treatment performed *in vitro* is a short (3h-6h) and acute (100 nM)  
304 exposure to insulin whereas tumors from Rag/MKR mice are exposed to chronic  
305 (several weeks) endogenous hyperinsulinemia. These factors may explain the  
306 differences in gene expression as well as pathways induced by insulin *in vitro* and *in*  
307 *vivo*. Altogether, our results show that hyperinsulinemia enhances MDA-MB-231 derived  
308 tumor growth possibly through enhanced histone acetylation.

309

## 310 **Discussion**

311 Metabolic syndrome and its associated disorders are increasingly being recognized as  
312 enhanced risk factors for several types of cancers, including breast cancer. We  
313 investigated the impact of hyperinsulinemia, an important feature of metabolic  
314 syndrome, on chromatin and gene expression changes in TNBC cells. We observed  
315 genome-wide increases in chromatin-associated histone acetylation that was dependent  
316 on the insulin mediated signaling through the PI3K-AKT-mTOR pathway. We used a  
317 quantitative method of ChIP-seq (ChIP-Rx) to identify the regions associated with  
318 changes in H3K9ac in response to insulin. We found genome-wide increases in H3K9ac  
319 occupancy at gene promoters especially those that increased expression after insulin  
320 treatment. However, insulin-induced increase in histone acetylation at gene promoters  
321 was not always associated with an increase in gene expression indicating that  
322 increased acetylation at these sites may have a distinct function. Our observation is  
323 supported by a recent study investigating histone acetylation levels in response to high  
324 glucose levels (Lee et al., 2018). Interestingly, it has been proposed that histone  
325 acetylation may function as a capacitor for acetate/acetyl-CoA which could be utilized

326 as an energy source or to balance the intracellular pH based on cellular condition  
327 (Kurdistani, 2014).

328 Insulin has long been proposed to be involved in breast tumor progression. Fifty percent  
329 of breast tumors and most established breast cancer cell lines including TNBC cell lines  
330 overexpress IR (Belfiore et al., 2009; Frasca et al., 1999; Gallagher & LeRoith, 2010;  
331 Law et al., 2008; Papa et al., 1990) and insulin induces proliferation in several breast  
332 cancer cell lines (Gliozzo et al., 1998). Our data further reinforce these observations.  
333 We find that insulin induces genes involved in ribosome biogenesis, transcription,  
334 splicing and metabolism that are regulated by MYC (c-Myc). Moreover, genes involved  
335 in apoptosis are downregulated in response to insulin.

336 Insulin enhances utilization of glucose by inducing mitochondrial activity and biogenesis  
337 through mTOR. Tumor cells are known to reprogram metabolic pathways to support the  
338 increased demand for macromolecules required for uncontrolled proliferation in  
339 response to growth factors. Acetyl-CoA is a central metabolite that links glucose  
340 metabolism to lipid synthesis as well as regulation of chromatin (Kinnaird, Zhao, Wellen,  
341 & Michelakis, 2016). Histone acetylation levels have been earlier shown to correlate  
342 with acetyl-CoA abundance (Cluntun et al., 2015). In proliferating cells, acetyl-CoA can  
343 be generated by a) oxidative decarboxylation of pyruvate from glycolysis; b) ATP-citrate  
344 lyase (ACLY) utilizing cytosolic citrate and c) ACS2 using acetate (Kinnaird et al.,  
345 2016). ACLY activity is enhanced by AKT mediated phosphorylation thereby  
346 establishing a link between insulin signaling, acetyl-CoA levels and histone acetylation  
347 in the nucleus (Lee et al., 2014). The genome-wide increase in histone acetylation we  
348 observe in response to insulin might be a result of increased acetyl-CoA abundance due  
349 to increased ACLY activity.

350 Our findings also suggest that insulin induces ROS. This could be a result of increased  
351 mitochondrial activity as well as due to a decrease in scavenger proteins such as SOD2  
352 (Superoxide dismutase 2). Indeed, we observe higher mitochondrial activity as well as  
353 decreased expression of SOD2 in response to insulin (RNA-seq results). Moreover, we  
354 find increased accumulation of DNA damage foci when the ROS levels peak after  
355 insulin treatment. These results indicate that increased insulin signaling might

356 predispose cells to deleterious mutations if they fail to repair the damage. This might be  
357 very relevant in the context of BRCA1 mutated triple negative breast cancer cells.

358 We also show that tumors derived from hyperinsulinemic mice showed enhanced  
359 expression of extracellular matrix genes and decreased expression of DNA damage  
360 checkpoint genes which might help in tumor progression. However, the genes  
361 expressed in response to insulin exposure in the *in vitro* and *in vivo* conditions were  
362 markedly different, possibly due to the different microenvironments as well as  
363 interactions between tumor cells and extracellular matrix in the xenografted tumors.  
364 Given the link between hyperinsulinemia and the poor prognosis of breast cancer  
365 patients diagnosed with TNBC, understanding the cellular changes in response to  
366 hyperinsulinemia is important. Our finding that insulin drives hyperacetylation of  
367 histones in chromatin –thus impacting the transcriptome –highlights the impact insulin  
368 has within the nucleus.

369

## 370 **Materials and Methods**

### 371 **Cell Culture**

372 Human cell line MDA-MB-231 (Cat No. HTB-26) and *Drosophila* S2 cells (Cat No. CRL-  
373 1963) were purchased from American Type Culture Collection (ATCC, Manassas, VA,  
374 USA). MDA-MB-231 cells were grown in Dulbecco's modified Eagle's medium (DMEM)  
375 with high glucose (25mM) (Cat. No. 25-500; Genesee Scientific, San Diego, CA) at  
376 37°C, 5% CO<sub>2</sub> in a humidified chamber. S2 cells were cultured in Schneider's  
377 *Drosophila* medium (Cat. No. 21720024; ThermoFisher Scientific, Waltham, MA) at  
378 24°C in a humidified chamber without CO<sub>2</sub>. All media were supplemented with 10%  
379 heat-inactivated Fetal Bovine Serum (v/v) (SH30910.03, Fisher) and 1X antibiotics  
380 containing penicillin and streptomycin (Cat. No. 25-512, Genesee). Prior to insulin  
381 treatment, MDA-MB-231 cells were serum depleted in DMEM high glucose (25mM)  
382 medium containing 0.2% BSA (serum depletion medium) for 24h and then stimulated  
383 with 100nM insulin (Cat No. I9278; Sigma-Aldrich, St. Louis, MO) or left untreated (UT)  
384 for indicated time periods. Cell lines used in this study were tested and found to be  
385 mycoplasma negative.

## 386 **Western Blot**

387 Cells were seeded at a density of  $0.5 \times 10^6$  cells per well in six well plates. The medium  
388 was changed to serum depletion medium 48h post-seeding. Insulin (100nM) treatment  
389 was done after 24h of serum depletion for indicated time durations. Cells were collected  
390 by scraping and centrifugation at  $800\times g$  for 5 mins at  $4^\circ\text{C}$ . Cell pellet was washed once  
391 with PBS and resuspended in 20 cell volumes of 1X SDS sample buffer. Cell lysates  
392 were prepared by performing two iterations of vortexing and heating at  $95^\circ\text{C}$  for 5 mins.  
393 Lastly, the cell lysates were sonicated using a Bioruptor<sup>R</sup> pico (Diagenode, Leige,  
394 Belgium) for three cycles (30 sec on/30 sec off) at room temperature (RT) and cleared  
395 by centrifugation at  $16000\times g$  for 5 mins at RT. Western blotting was performed by  
396 running cell lysates on a gradient SDS-PAGE gel and transferring onto a PVDF  
397 membrane. Western blots were probed with antibodies specific to acetylated H3 (acH3)  
398 (Cat Nos. ab47915; Abcam, Cambridge, UK), H3K9ac (ab4441; Abcam), H3K14ac  
399 (C10010-1; EpiGentek, Farmingdale, NY), H3 (ab1791; Abcam), anti-phospho-AKT  
400 (2965S; Cell Signaling Technology, Danvers, MA), anti-AKT (2920S; Cell Signaling  
401 Technology), anti-phospho-S6K (9206S; Cell Signaling Technology), anti-S6K (9202S;  
402 Cell Signaling Technology), TFAM (7495S; Cell Signaling Technology), ATP5D  
403 (ab97491; Abcam), c-Myc (sc-40X; Santa Cruz Biotechnology, Dallas, TX), NRF1  
404 (ab34682; Abcam),  $\gamma\text{H2AX}$  (NB100-78356; Novus Biologicals, Littleton, CO), tubulin  
405 (2125S; Cell Signaling Technology) and actin (Sigma, A5441). After primary antibody  
406 incubation, blots were incubated with HRP-conjugated anti-rabbit or anti-mouse  
407 secondary antibodies (1:5000 dilution; Abcam, Cat. Nos. ab6721 and ab6789) and  
408 protein bands were visualized using chemiluminescence detection (Cat. No. 34076,  
409 Thermofisher Scientific).

## 410 **Mitochondrial DNA and ATP measurement**

411 For mitochondrial DNA quantification, genomic DNA and mitochondrial DNA was  
412 extracted from insulin treated cells using DNeasy Blood and Tissue kit (Qiagen, Hilden,  
413 Germany). Genomic and mitochondrial DNA were quantified by qPCR using  
414 mitochondrial and genomic DNA specific primers; namely, cytochrome B and RPL13A  
415 (Table S2).



416 For ATP measurement, MDA-MB-231 cells untreated or treated with insulin in 12 well  
417 plates were lysed by boiling in deionized water for 5 mins. The lysate was clarified by  
418 centrifugation at 16000×g for 10mins at 4°C. ATP levels were measured using the  
419 luciferase-based ATP determination kit (Cat No. A22066; Thermofisher Scientific).

#### 420 **Inhibitor treatment**

421 MDA-MB-231 cells were pretreated with various signaling pathway inhibitors; LY294002  
422 (50µM), MK-2206 (10µM), Rapamycin (20nM), Metformin (1mM) or vehicle DMSO for  
423 1h prior to insulin treatment (100nM, 3h). The cells were then processed for western  
424 blot assays. LY294002 was purchased from Cell Signaling Technology (Cat No.  
425 9901S). MK-2206 (Cat No. 11593) and Rapamycin (Cat No. 13346) were purchased  
426 from Cayman Chemical (Ann Arbor, MI). Metformin was purchased from Sigma-Aldrich  
427 (Cat No. D150959).

#### 428 **Chromatin fractionation**

429 Chromatin fractionation was performed using the method described in (Mendez &  
430 Stillman, 2000). Briefly, cells were collected from six well plates after insulin treatment  
431 by scraping and centrifugation at 200×g for 2 mins. Cell pellet was washed twice with  
432 PBS and resuspended and incubated in 100µl buffer A (10mM HEPES, pH 7.9, 10mM  
433 KCl, 1.5mM MgCl<sub>2</sub>, 0.34M sucrose, 10% glycerol, 1mM DTT) supplemented with  
434 protease inhibitors and 0.1% Triton X-100 for 8 mins on ice. Nuclei were isolated by  
435 centrifugation at 1300×g for 5 mins at 4°C. The nuclear pellet thus obtained was  
436 washed once with buffer A and then resuspended in 100µl buffer B (3mM EDTA, 0.2mM  
437 EGTA, 1mM DTT) supplemented with protease inhibitors and incubated for 30 mins on  
438 ice. The nuclear suspension was centrifuged at 1700×g for 5 mins at 4°C to obtain  
439 nuclear soluble fraction in the supernatant and chromatin fraction in pellet. The  
440 chromatin fraction was resuspended in 1X SDS sample buffer and boiled at 95°C for 5  
441 mins.

#### 442 **Immunofluorescence analyses**

443 MDA-MB-231 cells were grown on cover slips coated with poly-L-lysine at 37°C in a 5%  
444 CO<sub>2</sub> incubator. After treatment, the DMEM medium was aspirated out and the cell layer



445 was washed twice with PBS. The cells were fixed with 4% para-formaldehyde in PBS  
446 for 10 mins at RT. The para-formaldehyde solution was removed and quenched with  
447 100mM Tris pH 7.2 for 5 mins at RT. The fixed cells were subsequently permeabilized  
448 by incubating in 0.1% Triton X-100 solution in PBS for 10 mins. The cells were then  
449 washed twice with PBS at 5 mins intervals and blocked using the blocking solution (10%  
450 FBS, 3% BSA in PBS containing 0.1% Triton X-100), for 45 mins at 37°C. After  
451 incubation, the blocking solution was replaced with anti- $\gamma$ H2AX antibody (Novus  
452 biologicals, Cat No. NB100-78356, 1 in 1000 dilution) for 30 mins at 37°C. The cells  
453 were then washed with the wash buffer (PBS containing 0.1% Triton X-100) twice for 5  
454 mins each. Subsequently the cells were incubated with Alexa-488 conjugated anti-  
455 mouse antibody (Cat No. A-11029, 1 in 1000 dilution; ThermoFisher Scientific) for 30  
456 mins at 37°C. The cells were washed with the wash buffer twice for 5 mins each.

457 For reactive oxygen species detection, insulin treated or untreated cells seeded on  
458 coverslips were treated with 5  $\mu$ M CellROX Green reagent (Cat No. C10444;  
459 ThermoFisher Scientific) for 30 mins in culture medium at 37°C. Subsequently, the  
460 culture medium was aspirated and cells were washed thrice with PBS. Nuclei were  
461 stained using 10  $\mu$ g/ml DAPI solution (Cat No. D1306; ThermoFisher Scientific) for 5  
462 mins in the dark, followed by two washes with PBS. The coverslips were then inverted  
463 onto a microscopic slide over a drop of 70% Glycerol (in PBS) for visualization. The  
464 Alexa, DAPI and CellROX Green fluorescence were visualized with a Carl Zeiss  
465 confocal laser scanning microscope LSM 710 META. Images were captured using Zen  
466 software. ImageJ software was used to process the images. The images for  
467 comparative studies were captured at identical microscope settings.

#### 468 **ChIP-Rx**

469 ChIP-Rx was performed as described in (Orlando et al., 2014) with minor modifications.  
470 MDA-MB-231 cells were seeded at a density of  $1 \times 10^6$  cells in 60mm dishes and treated  
471 with 100nM insulin as described above. After treatment, cells were cross-linked using  
472 1% formaldehyde for 10 mins at RT, followed by addition of 0.125 M glycine for 5 mins  
473 to stop the reaction. In parallel, S2 cells were crosslinked at a density of  $1 \times 10^6$  cells per  
474 ml using 1% formaldehyde. Crosslinked cells were then washed twice with ice-cold PBS

475 supplemented with protease inhibitors. MDA-MB-231 and S2 cells were resuspended in  
476 parallel in cold lysis buffer 1 (140mM NaCl, 1mM EDTA, 50mM HEPES pH 7.5, 10%  
477 Glycerol, 0.5% NP-40, 0.25% Triton-X-100) supplemented with protease inhibitors  
478 (COmplete, Cat. No.11873580001, Sigma) and incubated on ice for 10 mins. Next,  
479 centrifugation was performed at 800×g for 5 mins at 4°C to pellet nuclei. Nuclear pellets  
480 were then resuspended in parallel in lysis buffer 2 (10mM Tris pH 8.0, 200mM NaCl,  
481 1mM EDTA, 0.5mM EGTA) supplemented with protease inhibitors and incubated for 10  
482 mins on ice. At this step, *Drosophila* nuclear suspension was added to each untreated  
483 and treated human MDA-MB-231 nuclear suspension at a ratio of (1 *Drosophila* cell per  
484 2 human cells) or  $1.5 \times 10^6$  S2 cells to  $3 \times 10^6$  MDA-MB-231 cells. The composite cell  
485 nuclei were then pelleted at 800×g for 5 mins at 4°C.

486 Composite cell pellets were resuspended in SDS lysis buffer (1% SDS, 10mM EDTA,  
487 50mM Tris-HCl, pH 8) supplemented with protease inhibitors and subjected to  
488 sonication using a Bioruptor<sup>R</sup> pico for six cycles (30 sec on/30 sec off) to produce DNA  
489 fragments of 200–500 bp in length. Sheared chromatin was clarified by centrifugation at  
490 16000×g for 5mins at 4°C.  $0.3 \times 10^6$  cell equivalents were diluted with ten volumes of  
491 cold CHIP-dilution buffer (0.01% SDS, 1.1% Triton X-100, 1.2 mM EDTA, 16.7 mM Tris-  
492 HCl, pH 8, 167 mM NaCl) supplemented with protease inhibitors and used for each  
493 immunoprecipitation. About 10% of the chromatin from each ChIP reaction was saved  
494 as input. ChIP assays were performed with 5µg anti-H3K9ac antibody and 25µl of  
495 magnetic protein G Dynabeads (Cat. No. 10004D; Thermofisher Scientific) which were  
496 incubated overnight at 4°C. 5µg rabbit IgG was used for control ChIPs. Magnetic beads  
497 were washed successively with low salt buffer (0.1% SDS, 1% Triton X-100, 2mM  
498 EDTA, 20mM Tris-HCl, pH 8, 150 mM NaCl), high salt buffer (0.1% SDS, 1% Triton X-  
499 100, 2mM EDTA, 20mM Tris-HCl pH 8, 500mM NaCl), LiCl buffer (250 mM LiCl, 1%  
500 NP40, 1% NaDOC, 1mM EDTA, 10mM Tris-HCl, pH 8), and twice with TE buffer (10mM  
501 Tris-HCl pH 8, 1mM EDTA). Elution buffer (1% SDS and 100mM NaHCO<sub>3</sub>) was added  
502 to the washed beads, and the bead solution was incubated at RT for 30 mins. In  
503 parallel, the saved input was also diluted in Elution buffer. The DNA-protein complexes  
504 were then reverse cross-linked by adding 200mM NaCl, 20 µg Proteinase K (Cat. No.

505 P4850; Sigma-Aldrich) and incubating at 65°C for 4 hours. Subsequently, 20 µg of  
506 RNase A (Cat No. EN0531; ThermoFisher Scientific) was added and further incubated  
507 for 15 mins at 37°C. The immunoprecipitated DNA was extracted using phenol-  
508 chloroform and ethanol precipitation. Resultant ChIP DNA was quantified using Quant-  
509 iT™ dsDNA Assay Kit (Cat No. Q33120; ThermoFisher Scientific) and used for library  
510 preparation.

511 ChIP-seq libraries were made using Illumina Tru-Seq library preparation kit (Illumina,  
512 San Diego, CA) and multiplexing barcodes compatible with Illumina HiSeq 2500  
513 technology. About 50 million single-end reads of length 51 bp were generated from  
514 each ChIP-seq library.

### 515 **ChIP-seq analyses**

516 Sequencing reads from each library were aligned to a combined reference genome  
517 (human + *Drosophila*) using bowtie (Langmead, Trapnell, Pop, & Salzberg, 2009). The  
518 combined reference genome was generated as described in (Orlando et al., 2014).  
519 Briefly, a combined genome sequence was created by concatenating the genome  
520 sequences of human (hg19) and *Drosophila* (dm3). Next, custom bowtie indexes were  
521 generated for the combined genome sequence using ‘bowtie-build’ command. Bowtie  
522 alignment was done against the combined genome using parameters: -m 1 -e 70 -k 1 -n  
523 2 --best --chunkmbs 200. About 6% of reads aligned to the dm3 genome and ~94%  
524 aligned to the hg19 genome. The number of reads aligned to human and *Drosophila*  
525 genome are reported in Table S1. We identified a union set of 40,222 and 5,716  
526 H3K9ac peaks in the human and *Drosophila* cells respectively. We normalized peak  
527 scores for the 40,222 human (hg19) peaks using hg19 aligned read counts (read count  
528 normalization) (Figure S2A). Moreover, we used *Drosophila* (dm3) aligned read counts  
529 for normalizing peak scores (spike normalization) (Figure S2B). Significantly, we  
530 observed greater changes in H3K9ac levels on peaks in 3h and 6h insulin treated cells  
531 after spike normalization as compared to read count normalization (Figure S2C and D).  
532 The effect of spike normalization was also evident in aggregate profiles of H3K9ac ±2kb  
533 around annotated transcription start sites (TSSs) (Figure S2E and F). Overall spike

534 normalization led to better conformity between replicates and revealed global increase  
535 in histone acetylation that could be quantified.

### 536 **RNA-seq analyses**

537 Total RNA was isolated from insulin treated cells or from tumors tissues using  
538 NucleoSpin® RNA kit (Macherey-Nagel, Germany) with on-column DNase I digestion.  
539 PolyA-enriched RNA was isolated and used for library preparation using TruSeq RNA  
540 library Prep kit (Illumina). About 50 million single-end reads of length 51 bp were  
541 generated for the MDA-MB-231 samples and 50 million paired-end 100 bp reads were  
542 generated from the MDA-MB-231 xenograft tumors. Raw sequences were aligned to the  
543 hg19 reference genome using HISAT2 2.1.0 (Kim, Langmead, & Salzberg, 2015) using  
544 default parameters. Stringtie 1.3.4 (Pertea et al., 2015) was used with default  
545 parameters to assemble transcripts using the Genocde v19 transcript annotation.  
546 Assembled transcripts from all libraries were further merged using --merge option in  
547 Stringtie. Merged transcript abundances were measured using bedtools coverage and  
548 DESeq2 package (Love et al., 2014) was used to normalize counts and identify  
549 differentially expressed genes ( $\log_2$  fold change  $\geq 0.5$  and  $p_{adj} < 0.1$ ). Gene Set  
550 Enrichment Analysis (GSEA) (Subramanian et al., 2005) was used to determine  
551 significantly altered gene ontology and pathways. For validation of RNA-seq data, 1 $\mu$ g  
552 total RNA was used to synthesize cDNA using High-Capacity cDNA Reverse  
553 Transcription Kit (Cat No. 4368814; ThermoFisher Scientific). Gene expression was  
554 analyzed by quantitative PCR (qPCR) using KAPA SYBR® Fast ROX Low qPCR  
555 Master (Cat No. KM4117, Kapa Biosystems, Inc., Wilmington, MA) using gene-specific  
556 primers (Table S2). Relative gene expression between groups was determined using  $2^{-\Delta\Delta Ct}$   
557  $\Delta\Delta Ct$  method after normalization with 18S levels.

### 558 **Visualization of ChIP-seq data and additional analyses**

559 Reads aligning to the hg19 genome were filtered out from the aligned bam files and  
560 peaks were called for each library with respective Input using macs2 (Zhang et al.,  
561 2008) with broad peak calling option and  $q < 0.1$  for broad regions and  $q < 0.05$  for  
562 narrow regions. Peaks were annotated using annotatePeaks.pl command in homer

563 (Heinz et al., 2010) and assigned to the nearest hg19 RefSeq gene TSS. Wiggle tracks  
564 were generated using custom scripts, normalized by the number of dm3 aligned reads  
565 and visualized on the UCSC Genome Browser. Heatmaps were generated using Java  
566 TreeView (Saldanha, 2004) and aggregate profiles were made using deepTools  
567 (Ramirez et al., 2016). Motif enrichment analysis was performed using  
568 findMotifsGenome.pl command in homer.

## 569 **Human samples**

570 Blood samples were obtained from patients after an 8h fasting period following  
571 institutional guidelines at the City of Hope (IRB no. 15418) in purple-top EDTA  
572 vacutainer tubes after obtaining written informed consent. Insulin resistance was  
573 identified by measuring Hemoglobin A1C (HbA1c) using HPLC method (Davis,  
574 McDonald, & Jarett, 1978). HbA1C levels between 5.7-6.3 were used to define insulin-  
575 resistance. All individuals were within ages of 18-55. PBMCs were isolated from whole  
576 blood using Ficoll-Paque method. Briefly, whole blood was diluted 1:1 with PBS  
577 containing 2% FBS, layered on top of 15 ml Ficoll and spun down at 1200×g for 10  
578 mins. The white buffy coat containing PBMCs were collected and washed twice with  
579 PBS containing 2% FBS and spun down at 1200×g for 10 mins to remove platelets. 0.5  
580 ×10<sup>6</sup> PBMCs were lysed in 20 cell volumes of 1X SDS sample buffer and processed for  
581 western blot analyses.

## 582 **Tumor xenograft studies**

583 Animal studies were performed at the Icahn School of Medicine at Mount Sinai (ISMMS)  
584 Center for Comparative Medicine and Surgery. All studies were approved by the ISMMS  
585 Institutional Animal Care and Use Committee. All animals used for the studies, were  
586 female, on an FVB/n background. The immunodeficient hyperinsulinemic mice were  
587 generated as previously described by crossing the recombination-activating gene 1  
588 (*Rag1*) knockout mice with the muscle creatinine kinase promoter expressing dominant-  
589 negative *Igf1r* (MKR) mice (Zelenko et al., 2016). The metabolic phenotyping of the  
590 *Rag1* knockout (*Rag1*<sup>-/-</sup>) / MKR mice and control *Rag1*<sup>-/-</sup> mice has been characterized  
591 previously (Zelenko et al., 2016). Mice for this study were maintained on regular diet

592 (PicoLab Rodent Diet 20, 5053), with free access to water and a 12 hour light / dark  
593 cycle.  $5 \times 10^6$  MDA-MB-231 tumor cells were injected into the inguinal mammary fat pad  
594 of *Rag1*<sup>-/-</sup> and *Rag1*<sup>-/-</sup>/MKR female mice aged between 8 and 10 weeks. MDA-MB-231  
595 tumor growth was measured as previously described (Shlomai et al., 2017). At the end  
596 of the study, tumors were dissected and flash frozen in liquid nitrogen for further  
597 analysis.

## 598 **Statistical analyses**

599 Data are represented as mean and standard error of mean (Mean + SEM). Statistical  
600 analyses were performed using GraphPad Prism 7.0 software (GraphPad Prism  
601 Software Inc., San Diego, CA) and R. Normal distribution was confirmed using Shapiro-  
602 Wilk normality test before performing statistical analyses. For normally distributed data,  
603 comparison between two means were assessed by unpaired two-tailed Student's t test  
604 and that between three or more groups were evaluated using one-way analysis of  
605 variance (ANOVA) followed by Tukey's post hoc test. In case of Student's t-test, F-test  
606 was performed to check whether the variance in the groups compared were significantly  
607 different. For data where significantly different variances were observed, t-test with  
608 Welch correction was performed. For data that did not follow a normal distribution,  
609 Mann-Whitney test was performed for comparison between two groups and Kruskal  
610 Wallis test followed by Dunn's multiple comparisons test was performed for comparing  
611 more than two groups. A p-value of < 0.05 was considered statistically significant.  
612 Figures were generated using Adobe Illustrator software (San Jose, CA, USA).

## 613 **Acknowledgments**

614 Research reported in this publication was supported by the City of Hope CCSG Pilot  
615 award from National Cancer Institute of the National Institutes of Health under award  
616 number P30CA033572 and the National Cancer Institute grant (Grant Number:  
617 R01CA220693). We acknowledge services provided by the Integrative Genomics, Light  
618 Microscopy and DNA/RNA synthesis cores supported by the National Cancer Institute  
619 of the National Institutes of Health under award number P30CA033572. The content is

620 solely the responsibility of the authors and does not necessarily represent the official  
621 views of the National Institutes of Health.

622 **Competing Interests**

623 The authors declare that no competing interests exist.

624

625

626

627

628

629

630

631

632

633

634

635

636

637

638

639

640

641

642

643



## 644 References

- 645 Belfiore, A., Frasca, F., Pandini, G., Sciacca, L., & Vigneri, R. (2009). Insulin receptor isoforms and  
646 insulin receptor/insulin-like growth factor receptor hybrids in physiology and disease.  
647 *Endocr Rev*, *30*(6), 586-623. doi:10.1210/er.2008-0047
- 648 Belfiore, A., Frittitta, L., Costantino, A., Frasca, F., Pandini, G., Sciacca, L., . . . Vigneri, R. (1996).  
649 Insulin receptors in breast cancer. *Ann N Y Acad Sci*, *784*, 173-188.
- 650 Calle, E. E., & Kaaks, R. (2004). Overweight, obesity and cancer: epidemiological evidence and  
651 proposed mechanisms. *Nat Rev Cancer*, *4*(8), 579-591. doi:10.1038/nrc1408
- 652 Campbell, I. G., Russell, S. E., Choong, D. Y., Montgomery, K. G., Ciavarella, M. L., Hooi, C. S., . . .  
653 Phillips, W. A. (2004). Mutation of the PIK3CA gene in ovarian and breast cancer. *Cancer*  
654 *Res*, *64*(21), 7678-7681. doi:10.1158/0008-5472.CAN-04-2933
- 655 Carey, L., Winer, E., Viale, G., Cameron, D., & Gianni, L. (2010). Triple-negative breast cancer:  
656 disease entity or title of convenience? *Nat Rev Clin Oncol*, *7*(12), 683-692.  
657 doi:10.1038/nrclinonc.2010.154
- 658 Cluntun, A. A., Huang, H., Dai, L., Liu, X., Zhao, Y., & Locasale, J. W. (2015). The rate of glycolysis  
659 quantitatively mediates specific histone acetylation sites. *Cancer Metab*, *3*, 10.  
660 doi:10.1186/s40170-015-0135-3
- 661 Davis, J. E., McDonald, J. M., & Jarett, L. (1978). A high-performance liquid chromatography  
662 method for hemoglobin A1c. *Diabetes*, *27*(2), 102-107.
- 663 Del Giudice, M. E., Fantus, I. G., Ezzat, S., McKeown-Eyssen, G., Page, D., & Goodwin, P. J.  
664 (1998). Insulin and related factors in premenopausal breast cancer risk. *Breast Cancer*  
665 *Res Treat*, *47*(2), 111-120.
- 666 Di Cerbo, V., & Schneider, R. (2013). Cancers with wrong HATs: the impact of acetylation. *Brief*  
667 *Funct Genomics*, *12*(3), 231-243. doi:10.1093/bfgp/els065
- 668 Edmondson, R., Broglie, J. J., Adcock, A. F., & Yang, L. (2014). Three-dimensional cell culture  
669 systems and their applications in drug discovery and cell-based biosensors. *Assay Drug*  
670 *Dev Technol*, *12*(4), 207-218. doi:10.1089/adt.2014.573
- 671 Engelman, J. A., Luo, J., & Cantley, L. C. (2006). The evolution of phosphatidylinositol 3-kinases  
672 as regulators of growth and metabolism. *Nat Rev Genet*, *7*(8), 606-619.  
673 doi:10.1038/nrg1879
- 674 Ferguson, R. D., Novosyadlyy, R., Fierz, Y., Alikhani, N., Sun, H., Yakar, S., & Leroith, D. (2012).  
675 Hyperinsulinemia enhances c-Myc-mediated mammary tumor development and  
676 advances metastatic progression to the lung in a mouse model of type 2 diabetes.  
677 *Breast Cancer Res*, *14*(1), R8. doi:10.1186/bcr3089
- 678 Frasca, F., Pandini, G., Scalia, P., Sciacca, L., Mineo, R., Costantino, A., . . . Vigneri, R. (1999).  
679 Insulin receptor isoform A, a newly recognized, high-affinity insulin-like growth factor II  
680 receptor in fetal and cancer cells. *Mol Cell Biol*, *19*(5), 3278-3288.
- 681 Gallagher, E. J., Alikhani, N., Tobin-Hess, A., Blank, J., Buffin, N. J., Zelenko, Z., . . . LeRoith, D.  
682 (2013). Insulin receptor phosphorylation by endogenous insulin or the insulin analog  
683 AspB10 promotes mammary tumor growth independent of the IGF-I receptor. *Diabetes*,  
684 *62*(10), 3553-3560. doi:10.2337/db13-0249

- 685 Gallagher, E. J., & LeRoith, D. (2010). The proliferating role of insulin and insulin-like growth  
686 factors in cancer. *Trends Endocrinol Metab*, *21*(10), 610-618.  
687 doi:10.1016/j.tem.2010.06.007
- 688 Gliozzo, B., Sung, C. K., Scalia, P., Papa, V., Frasca, F., Sciacca, L., . . . Pezzino, V. (1998). Insulin-  
689 stimulated cell growth in insulin receptor substrate-1-deficient ZR-75-1 cells is mediated  
690 by a phosphatidylinositol-3-kinase-independent pathway. *J Cell Biochem*, *70*(2), 268-280.
- 691 Goodwin, P. J., Ennis, M., Pritchard, K. I., Trudeau, M. E., Koo, J., Madarnas, Y., . . . Hood, N.  
692 (2002). Fasting insulin and outcome in early-stage breast cancer: results of a prospective  
693 cohort study. *J Clin Oncol*, *20*(1), 42-51. doi:10.1200/JCO.2002.20.1.42
- 694 Goodwin, P. J., Ennis, M., Pritchard, K. I., Trudeau, M. E., Koo, J., Taylor, S. K., & Hood, N. (2012).  
695 Insulin- and obesity-related variables in early-stage breast cancer: correlations and time  
696 course of prognostic associations. *J Clin Oncol*, *30*(2), 164-171.  
697 doi:10.1200/JCO.2011.36.2723
- 698 Guertin, D. A., & Sabatini, D. M. (2007). Defining the role of mTOR in cancer. *Cancer Cell*, *12*(1),  
699 9-22. doi:10.1016/j.ccr.2007.05.008
- 700 Gunter, M. J., Hoover, D. R., Yu, H., Wassertheil-Smoller, S., Rohan, T. E., Manson, J. E., . . .  
701 Strickler, H. D. (2009). Insulin, insulin-like growth factor-I, and risk of breast cancer in  
702 postmenopausal women. *J Natl Cancer Inst*, *101*(1), 48-60. doi:10.1093/jnci/djn415
- 703 Heinz, S., Benner, C., Spann, N., Bertolino, E., Lin, Y. C., Laslo, P., . . . Glass, C. K. (2010). Simple  
704 combinations of lineage-determining transcription factors prime cis-regulatory elements  
705 required for macrophage and B cell identities. *Mol Cell*, *38*(4), 576-589.  
706 doi:10.1016/j.molcel.2010.05.004
- 707 Hostalek, U., Gwilt, M., & Hildemann, S. (2015). Therapeutic Use of Metformin in Prediabetes  
708 and Diabetes Prevention. *Drugs*, *75*(10), 1071-1094. doi:10.1007/s40265-015-0416-8
- 709 Huang, J., Morehouse, C., Streicher, K., Higgs, B. W., Gao, J., Czapiga, M., . . . Yao, Y. (2011).  
710 Altered expression of insulin receptor isoforms in breast cancer. *PLoS One*, *6*(10),  
711 e26177. doi:10.1371/journal.pone.0026177
- 712 Hur, K. Y., & Lee, M. S. (2015). New mechanisms of metformin action: Focusing on mitochondria  
713 and the gut. *J Diabetes Investig*, *6*(6), 600-609. doi:10.1111/jdi.12328
- 714 Hursting, S. D., Digiovanni, J., Dannenberg, A. J., Azrad, M., Leroith, D., Demark-Wahnefried, W.,  
715 . . . Berger, N. A. (2012). Obesity, energy balance, and cancer: new opportunities for  
716 prevention. *Cancer Prev Res (Phila)*, *5*(11), 1260-1272. doi:10.1158/1940-6207.CAPR-12-  
717 0140
- 718 Hynes, N. E., & Boulay, A. (2006). The mTOR pathway in breast cancer. *J Mammary Gland Biol*  
719 *Neoplasia*, *11*(1), 53-61. doi:10.1007/s10911-006-9012-6
- 720 Kim, D., Langmead, B., & Salzberg, S. L. (2015). HISAT: a fast spliced aligner with low memory  
721 requirements. *Nat Methods*, *12*(4), 357-360. doi:10.1038/nmeth.3317
- 722 Kinnaird, A., Zhao, S., Wellen, K. E., & Michelakis, E. D. (2016). Metabolic control of epigenetics  
723 in cancer. *Nat Rev Cancer*, *16*(11), 694-707. doi:10.1038/nrc.2016.82
- 724 Kurdistani, S. K. (2014). Chromatin: a capacitor of acetate for integrated regulation of gene  
725 expression and cell physiology. *Curr Opin Genet Dev*, *26*, 53-58.  
726 doi:10.1016/j.gde.2014.06.002

- 727 Langmead, B., Trapnell, C., Pop, M., & Salzberg, S. L. (2009). Ultrafast and memory-efficient  
728 alignment of short DNA sequences to the human genome. *Genome Biol*, *10*(3), R25.  
729 doi:10.1186/gb-2009-10-3-r25
- 730 Law, J. H., Habibi, G., Hu, K., Masoudi, H., Wang, M. Y., Stratford, A. L., . . . Dunn, S. E. (2008).  
731 Phosphorylated insulin-like growth factor-i/insulin receptor is present in all breast  
732 cancer subtypes and is related to poor survival. *Cancer Res*, *68*(24), 10238-10246.  
733 doi:10.1158/0008-5472.CAN-08-2755
- 734 Lawlor, D. A., Smith, G. D., & Ebrahim, S. (2004). Hyperinsulinaemia and increased risk of breast  
735 cancer: findings from the British Women's Heart and Health Study. *Cancer Causes  
736 Control*, *15*(3), 267-275. doi:10.1023/B:CACO.0000024225.14618.a8
- 737 Lee, J. V., Berry, C. T., Kim, K., Sen, P., Kim, T., Carrer, A., . . . Wellen, K. E. (2018). Acetyl-CoA  
738 promotes glioblastoma cell adhesion and migration through Ca(2+)-NFAT signaling.  
739 *Genes Dev*, *32*(7-8), 497-511. doi:10.1101/gad.311027.117
- 740 Lee, J. V., Carrer, A., Shah, S., Snyder, N. W., Wei, S., Venneti, S., . . . Wellen, K. E. (2014). Akt-  
741 dependent metabolic reprogramming regulates tumor cell histone acetylation. *Cell  
742 Metab*, *20*(2), 306-319. doi:10.1016/j.cmet.2014.06.004
- 743 Lipscombe, L. L., Goodwin, P. J., Zinman, B., McLaughlin, J. R., & Hux, J. E. (2006). Increased  
744 prevalence of prior breast cancer in women with newly diagnosed diabetes. *Breast  
745 Cancer Res Treat*, *98*(3), 303-309. doi:10.1007/s10549-006-9166-3
- 746 Love, M. I., Huber, W., & Anders, S. (2014). Moderated estimation of fold change and dispersion  
747 for RNA-seq data with DESeq2. *Genome Biol*, *15*(12), 550. doi:10.1186/s13059-014-  
748 0550-8
- 749 Manning, B. D., & Cantley, L. C. (2007). AKT/PKB signaling: navigating downstream. *Cell*, *129*(7),  
750 1261-1274. doi:10.1016/j.cell.2007.06.009
- 751 Mathieu, M. C., Clark, G. M., Allred, D. C., Goldfine, I. D., & Vigneri, R. (1997). Insulin receptor  
752 expression and clinical outcome in node-negative breast cancer. *Proc Assoc Am  
753 Physicians*, *109*(6), 565-571.
- 754 Mendez, J., & Stillman, B. (2000). Chromatin association of human origin recognition complex,  
755 cdc6, and minichromosome maintenance proteins during the cell cycle: assembly of  
756 prereplication complexes in late mitosis. *Mol Cell Biol*, *20*(22), 8602-8612.
- 757 Morita, M., Gravel, S. P., Chenard, V., Sikstrom, K., Zheng, L., Alain, T., . . . Sonenberg, N. (2013).  
758 mTORC1 controls mitochondrial activity and biogenesis through 4E-BP-dependent  
759 translational regulation. *Cell Metab*, *18*(5), 698-711. doi:10.1016/j.cmet.2013.10.001
- 760 Novosyadlyy, R., Lann, D. E., Vijayakumar, A., Rowzee, A., Lazzarino, D. A., Fierz, Y., . . . LeRoith,  
761 D. (2010). Insulin-mediated acceleration of breast cancer development and progression  
762 in a nonobese model of type 2 diabetes. *Cancer Res*, *70*(2), 741-751. doi:10.1158/0008-  
763 5472.CAN-09-2141
- 764 Orlando, D. A., Chen, M. W., Brown, V. E., Solanki, S., Choi, Y. J., Olson, E. R., . . . Guenther, M.  
765 G. (2014). Quantitative ChIP-Seq normalization reveals global modulation of the  
766 epigenome. *Cell Rep*, *9*(3), 1163-1170. doi:10.1016/j.celrep.2014.10.018
- 767 Papa, V., Pezzino, V., Costantino, A., Belfiore, A., Giuffrida, D., Frittitta, L., . . . Vigneri, R. (1990).  
768 Elevated insulin receptor content in human breast cancer. *J Clin Invest*, *86*(5), 1503-  
769 1510. doi:10.1172/JCI114868

- 770 Perteua, M., Perteua, G. M., Antonescu, C. M., Chang, T. C., Mendell, J. T., & Salzberg, S. L. (2015).  
771 StringTie enables improved reconstruction of a transcriptome from RNA-seq reads. *Nat*  
772 *Biotechnol*, 33(3), 290-295. doi:10.1038/nbt.3122
- 773 Pierobon, M., & Frankenfeld, C. L. (2013). Obesity as a risk factor for triple-negative breast  
774 cancers: a systematic review and meta-analysis. *Breast Cancer Res Treat*, 137(1), 307-  
775 314. doi:10.1007/s10549-012-2339-3
- 776 Ramirez, F., Ryan, D. P., Gruning, B., Bhardwaj, V., Kilpert, F., Richter, A. S., . . . Manke, T. (2016).  
777 deepTools2: a next generation web server for deep-sequencing data analysis. *Nucleic*  
778 *Acids Res*, 44(W1), W160-165. doi:10.1093/nar/gkw257
- 779 Saldanha, A. J. (2004). Java Treeview--extensible visualization of microarray data.  
780 *Bioinformatics*, 20(17), 3246-3248. doi:10.1093/bioinformatics/bth349
- 781 Saltiel, A. R., & Kahn, C. R. (2001). Insulin signalling and the regulation of glucose and lipid  
782 metabolism. *Nature*, 414(6865), 799-806. doi:10.1038/414799a
- 783 Shlomai, G., Zelenko, Z., Antoniou, I. M., Stasinopoulos, M., Tobin-Hess, A., Vitek, M. P., . . .  
784 Gallagher, E. J. (2017). OP449 inhibits breast cancer growth without adverse metabolic  
785 effects. *Endocr Relat Cancer*, 24(10), 519-529. doi:10.1530/ERC-17-0077
- 786 Su, X., Wellen, K. E., & Rabinowitz, J. D. (2016). Metabolic control of methylation and  
787 acetylation. *Curr Opin Chem Biol*, 30, 52-60. doi:10.1016/j.cbpa.2015.10.030
- 788 Subramanian, A., Tamayo, P., Mootha, V. K., Mukherjee, S., Ebert, B. L., Gillette, M. A., . . .  
789 Mesirov, J. P. (2005). Gene set enrichment analysis: a knowledge-based approach for  
790 interpreting genome-wide expression profiles. *Proc Natl Acad Sci U S A*, 102(43), 15545-  
791 15550. doi:10.1073/pnas.0506580102
- 792 Ueng, S. H., Chen, S. C., Chang, Y. S., Hsueh, S., Lin, Y. C., Chien, H. P., . . . Hsueh, C. (2012).  
793 Phosphorylated mTOR expression correlates with poor outcome in early-stage triple  
794 negative breast carcinomas. *Int J Clin Exp Pathol*, 5(8), 806-813.
- 795 Vander Heiden, M. G., Cantley, L. C., & Thompson, C. B. (2009). Understanding the Warburg  
796 effect: the metabolic requirements of cell proliferation. *Science*, 324(5930), 1029-1033.  
797 doi:10.1126/science.1160809
- 798 Vivanco, I., & Sawyers, C. L. (2002). The phosphatidylinositol 3-Kinase AKT pathway in human  
799 cancer. *Nat Rev Cancer*, 2(7), 489-501. doi:10.1038/nrc839
- 800 Witkiewicz, A. K., Kline, J., Queenan, M., Brody, J. R., Tsigos, A., Bilal, E., . . . Lisanti, M. P.  
801 (2011). Molecular profiling of a lethal tumor microenvironment, as defined by stromal  
802 caveolin-1 status in breast cancers. *Cell Cycle*, 10(11), 1794-1809.  
803 doi:10.4161/cc.10.11.15675
- 804 Zelenko, Z., Gallagher, E. J., Antoniou, I. M., Sachdev, D., Nayak, A., Yee, D., & LeRoith, D.  
805 (2016). EMT reversal in human cancer cells after IR knockdown in hyperinsulinemic  
806 mice. *Endocr Relat Cancer*, 23(9), 747-758. doi:10.1530/ERC-16-0142
- 807 Zhang, Y., Liu, T., Meyer, C. A., Eeckhoute, J., Johnson, D. S., Bernstein, B. E., . . . Liu, X. S. (2008).  
808 Model-based analysis of ChIP-Seq (MACS). *Genome Biol*, 9(9), R137. doi:10.1186/gb-  
809 2008-9-9-r137
- 810 Zhu, J., Blenis, J., & Yuan, J. (2008). Activation of PI3K/Akt and MAPK pathways regulates Myc-  
811 mediated transcription by phosphorylating and promoting the degradation of Mad1.  
812 *Proc Natl Acad Sci U S A*, 105(18), 6584-6589. doi:10.1073/pnas.0802785105
- 813

## 814 Figures

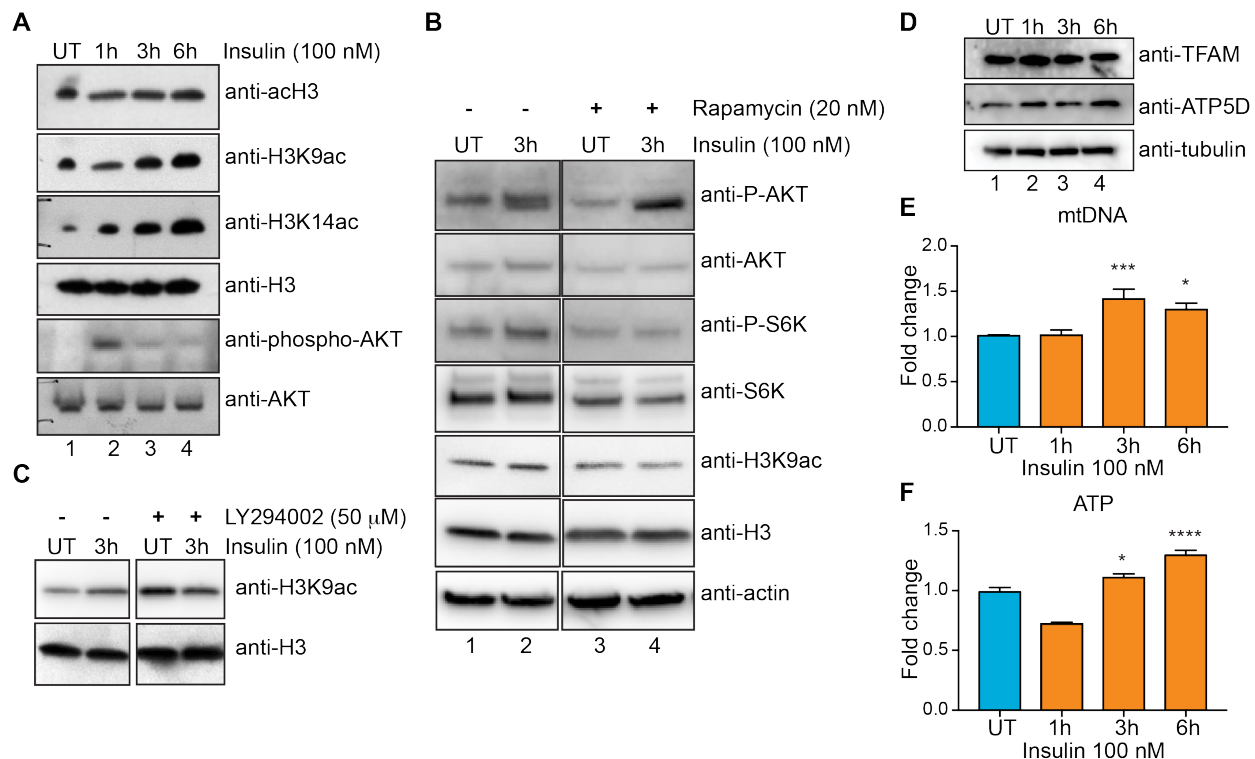

815  
 816 **Figure 1. Insulin induces histone acetylation increases in MDA-MB-231 cells through**  
 817 **PI3K-AKT-mTOR pathway and the mitochondria.** (A) Western blot analysis using the  
 818 indicated antibodies in MDA-MB-231 (TNBC cell line) cell lysates treated with insulin (100 nM)  
 819 for 1h, 3h or 6h. (B) Western blot analysis using the indicated antibodies in MDA-MB-231 cells  
 820 pretreated (lanes 3 and 4) or not (lanes 1 and 2) with 20 nM mTOR inhibitor rapamycin (1 h)  
 821 followed by insulin treatment for 3h. (C) Western blot analysis using the indicated antibodies in  
 822 MDA-MB-231 cells pretreated (lanes 3 and 4) or not (lanes 1 and 2) with 50 μM PI3K inhibitor  
 823 LY294002 (1h) followed by insulin treatment for 3h. (D) Western blot analysis using the  
 824 indicated antibodies in MDA-MB-231 cell lysates treated with insulin (100 nM) for 1h, 3h or 6h.  
 825 (E) Bars show fold change in mitochondrial DNA content and (F) ATP levels in MDA-MB-231  
 826 cells treated with insulin (100 nM) for 1h, 3h or 6h. (E-F) Values are Mean+SEM from three  
 827 independent experiments. Statistical significance was calculated using one-way ANOVA,  
 828 Dunnett's multiple comparisons test. \*p<0.05, \*\*p<0.01, \*\*\*p<0.001, \*\*\*\*p<0.0001.



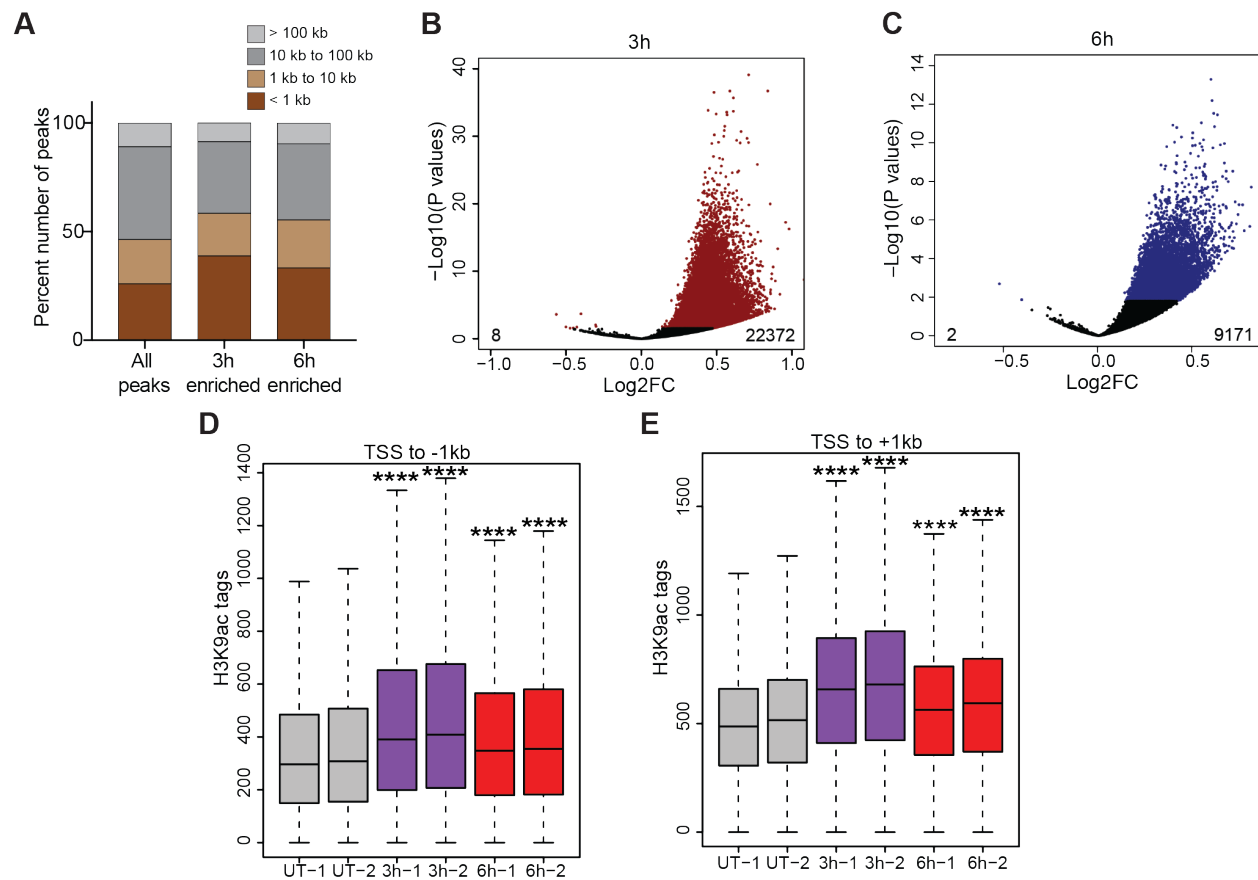

829

830 **Figure 2. Insulin induces H3K9ac acetylation on promoter regions.** (A) Stacked bars  
 831 showing the distribution of H3K9ac peaks categorized by distance to nearest transcription start  
 832 site (TSS). (B) Volcano plot showing the 22372 peaks that increased and 8 peaks that  
 833 decreased H3K9ac acetylation after 3h insulin treatment. (C) Volcano plot showing the 9171  
 834 peaks that increased and 2 peaks that decreased H3K9ac acetylation after 6h insulin treatment.  
 835 (D) Box plots showing the distribution of peak scores at -1kb to TSS regions of significantly  
 836 enriched H3K9ac peaks. (E) Box plots showing the distribution of peak scores at TSS to +1kb  
 837 regions of significantly enriched H3K9ac peaks. Significance was calculated using Kruskal  
 838 Wallis test followed by Dunn's multiple comparisons test. Adjusted p values were calculated  
 839 using Benjamini-Hochberg method. \*\*\*\*p < 0.0001.

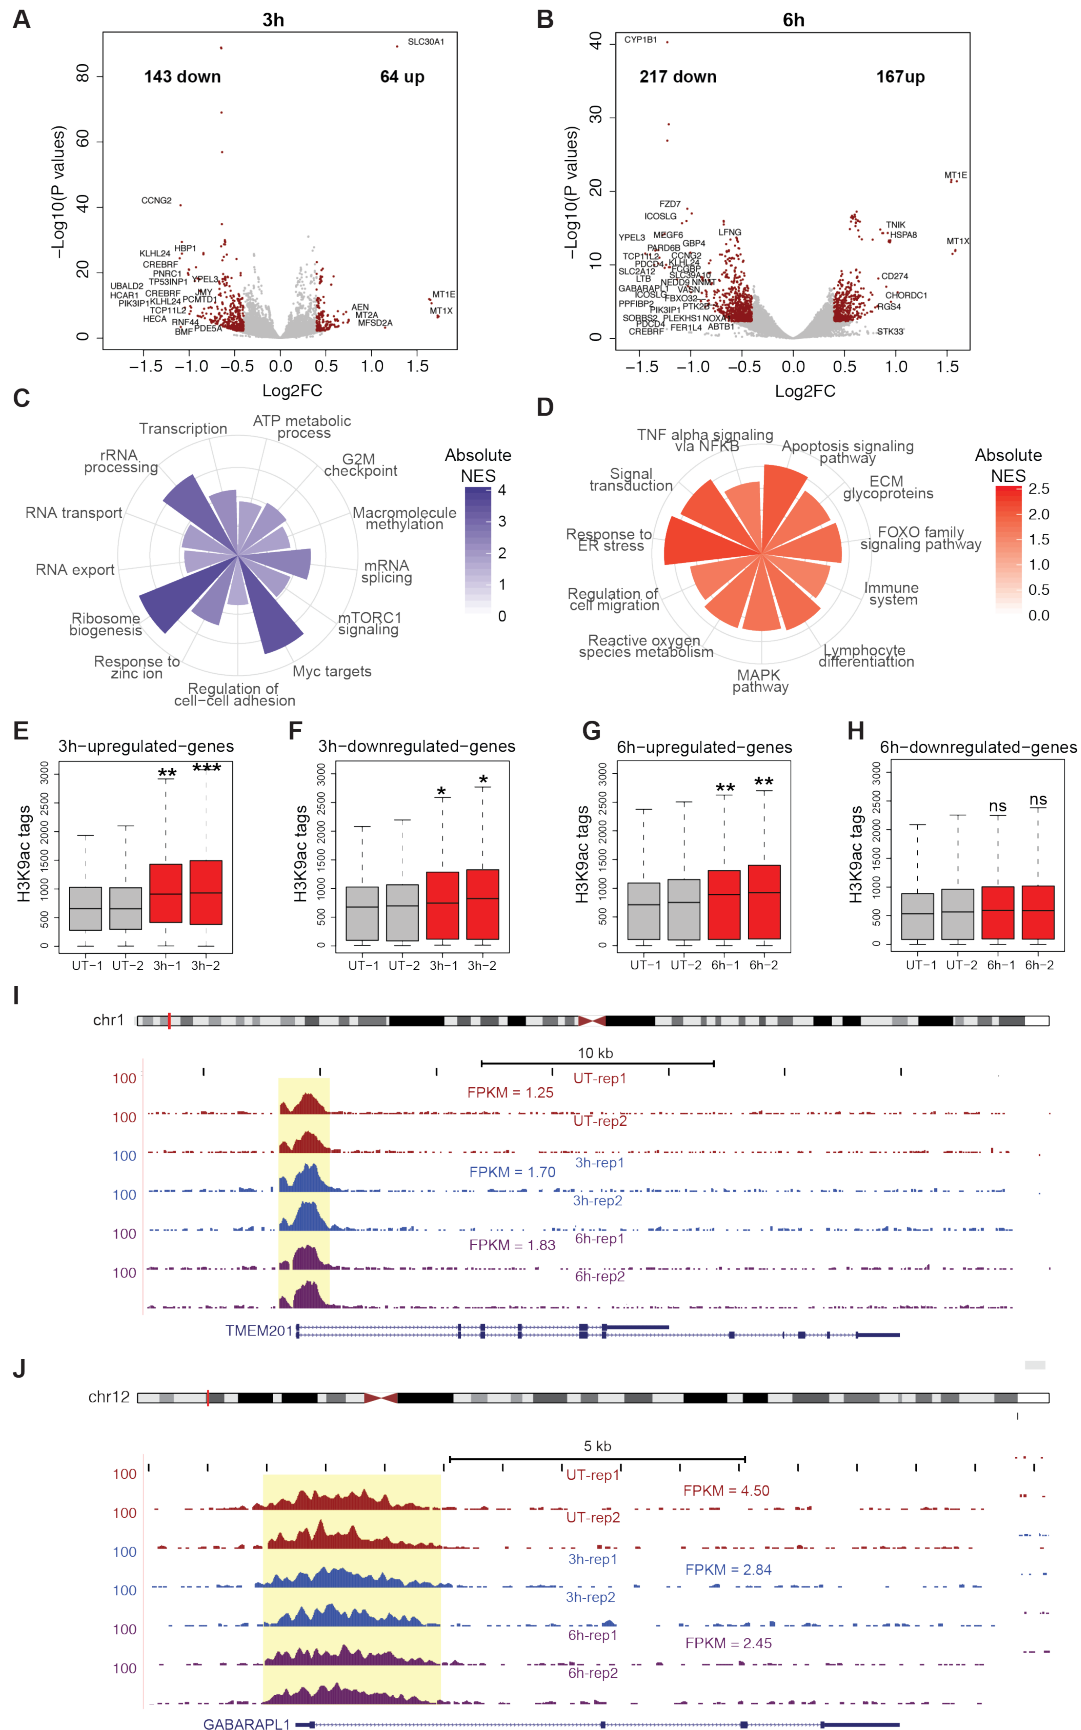



841 **Figure 3. Insulin induces specific increases in H3K9ac acetylation on promoters of**  
842 **insulin induced genes.** (A) Volcano plots showing the genes differentially expressed after 3h  
843 and (B) 6h insulin treatment. Differentially expressed genes are highlighted in red. (C) Gene  
844 sets enriched in Insulin upregulated genes and (D) Insulin downregulated genes. Absolute value  
845 of Normalized enrichment score (NES) from Gene Set Enrichment Analysis (GSEA) is shown.  $P$   
846  $< 0.05$ . (E-H) Box plots showing the normalized H3K9ac signal at promoters (TSS  $\pm 1$ kb) of  
847 genes upregulated and downregulated after 3h or 6h of insulin treatment as indicated.  
848 Significance was calculated using Kruskal Wallis test followed by Dunn's multiple comparisons  
849 test. Adjusted  $p$  values were calculated using Benjamini-Hochberg method. \* $p < 0.05$ , \*\* $p < 0.01$ ,  
850 \*\*\* $p < 0.001$ , \*\*\*\* $p < 0.0001$ . (I) Genome browser screen shots showing the H3K9ac signal at  
851 *TMEM201* (upregulated gene) and (J) *GABARAPL1* (downregulated gene). Expression values  
852 (FPKM) are shown.

853

854

855

856

857

858

859

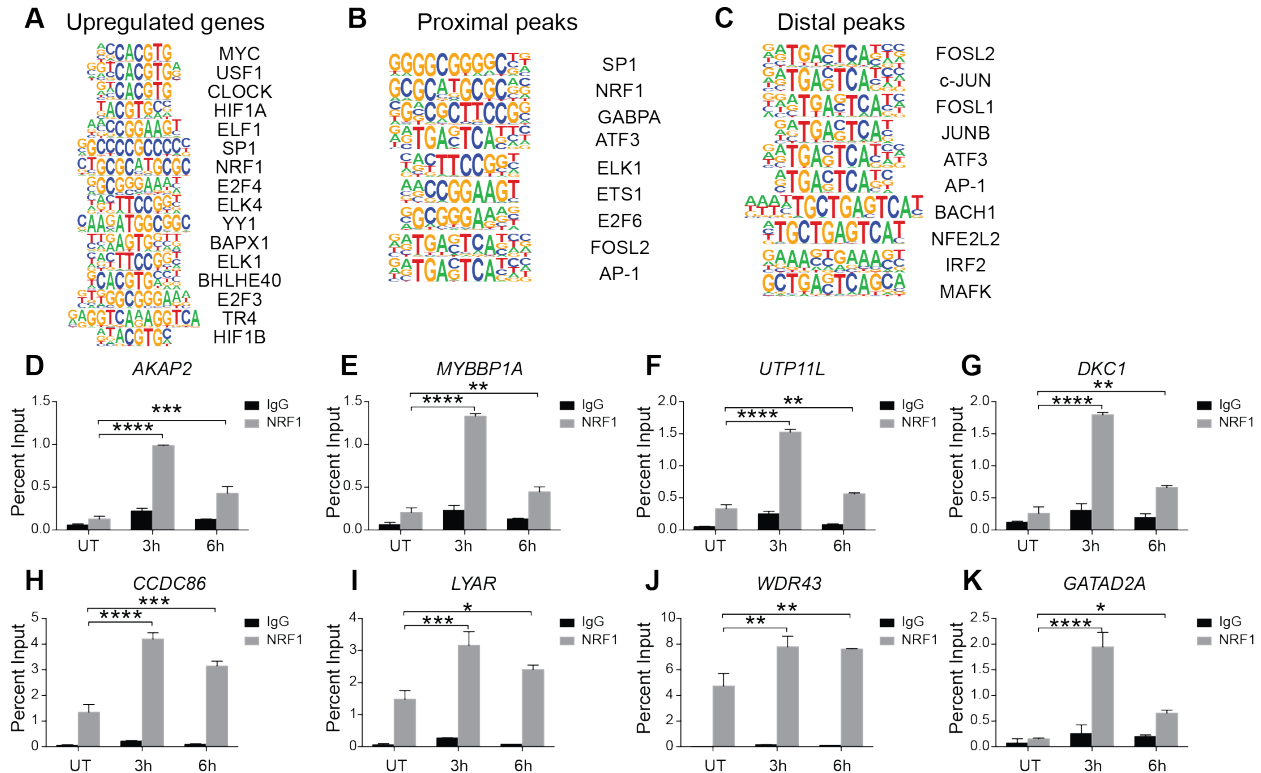

860  
861 **Figure 4. Transcription factors NRF1 is involved in insulin mediated gene expression**  
862 **changes and chromatin remodeling.** (A) Transcription factor binding motifs enriched in  
863 promoter regions (TSS±1kb) of upregulated genes. (B) Transcription factor binding motifs  
864 enriched in promoter proximal and (C) distal H3K9ac peaks respectively. (D-K) NRF1  
865 enrichment at NRF1 motifs in promoters of indicated insulin-upregulated genes determined by  
866 ChIP-qPCR in MDA-MB-231 cell lysates treated with insulin (100 nM) for 3h or 6h. Bars  
867 represent percent input pulldown in untreated (UT) and treated (3h, 6h) cells. Values are  
868 Mean+SEM from two independent experiments and three technical replicates from each  
869 experiment. Statistical significance was calculated using one-way ANOVA, Dunnett's multiple  
870 comparisons test. \*p<0.05, \*\*p<0.01, \*\*\*p<0.001, \*\*\*\*p<0.0001.

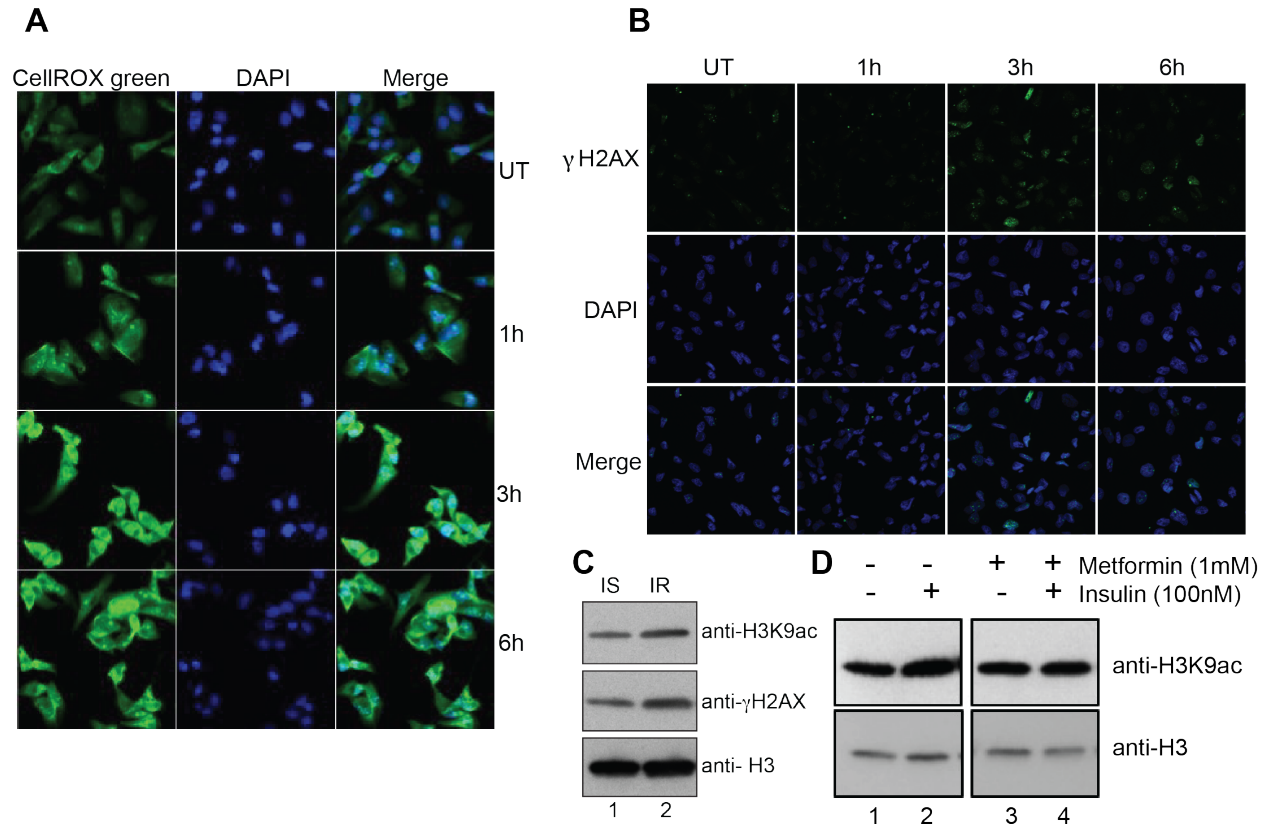

871

872 **Figure 5. Insulin induced reactive oxygen species (ROS) causes genome instability. (A)**

873 ROS induction in insulin treated cells as measured by fluorescence signal from the CellROX

874 green reporter. Nuclei are stained with DAPI. Magnification is 40X. (B) Representative

875 immunofluorescence images showing intensity of  $\gamma$ -H2AX (DNA damage marker) (green) on

876 MDA-MB-231 cells treated or untreated with Insulin (100 nM). Nuclei are stained with DAPI.

877 Magnification is 20X. UT: Untreated (C) Western blot analysis for H3K9ac and  $\gamma$ -H2AX (DNA

878 damage marker) on extracts from PBMCs isolated from insulin-sensitive (IS) and insulin-

879 resistant (IR) individuals. (D) Western blot analysis using H3K9ac antibody in MDA-MB-231

880 cells pretreated (lanes 3 and 4) or not (lanes 1 and 2) with 1 mM metformin (24 h) followed by

881 insulin treatment for 6h.

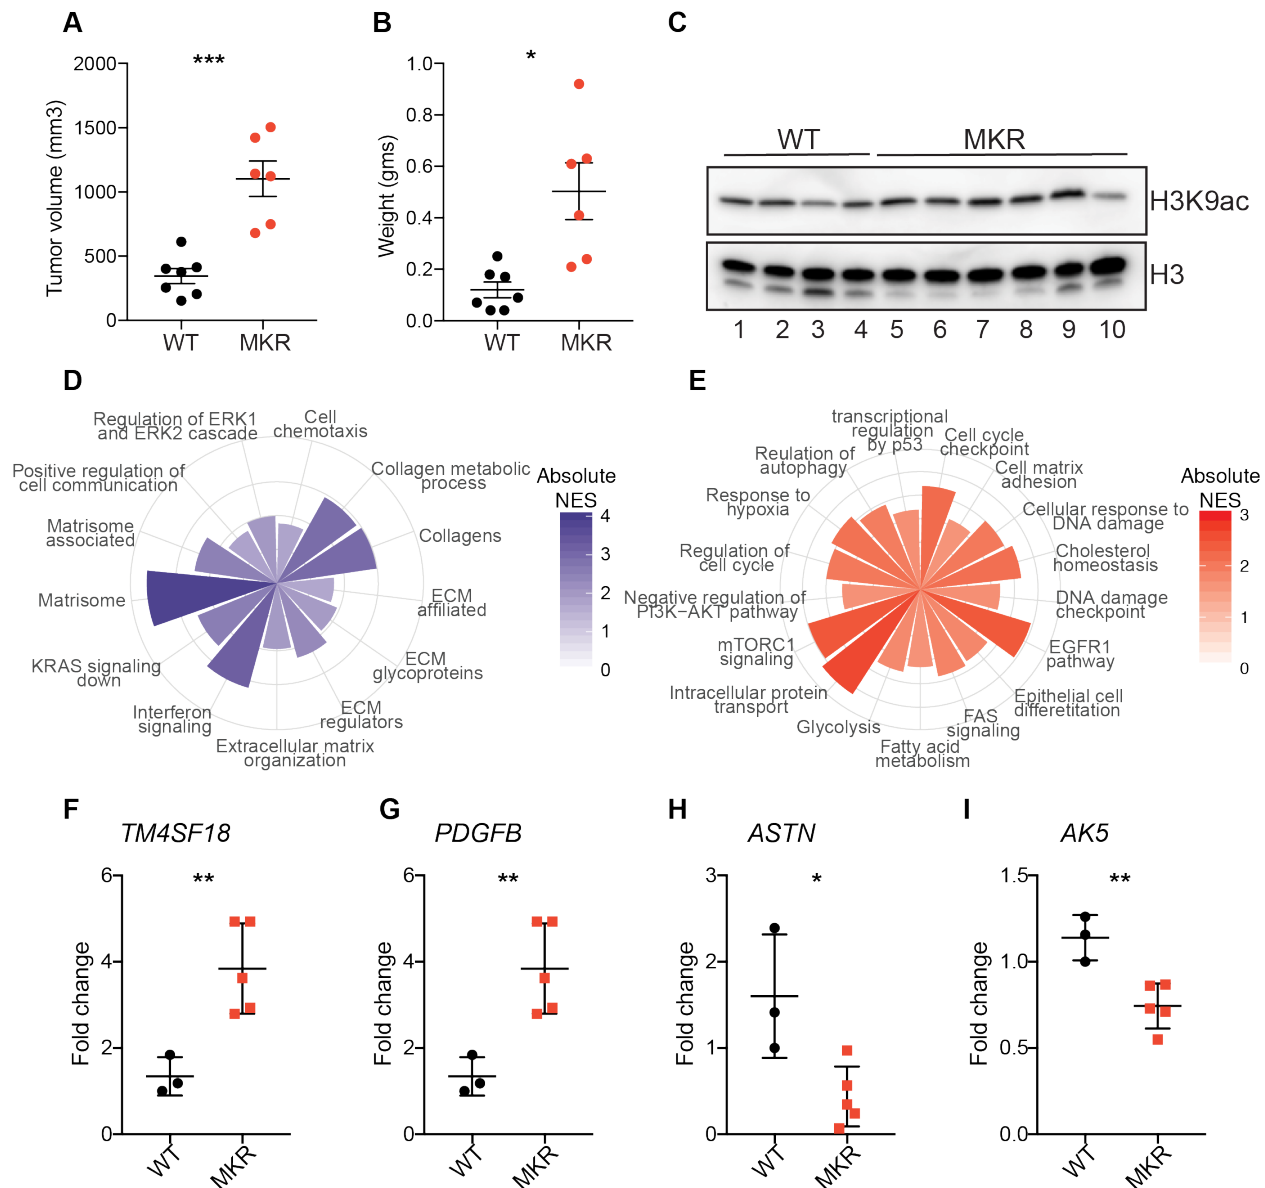

882

883 **Figure 6: Hyperinsulinemia enhances ECM genes in mice tumors.** (A) Tumor volume (mm<sup>3</sup>)  
 884 and (B) weight were compared for tumors from Rag/WT (WT) and Rag/MKR (MKR) mice.  
 885 Significance was calculated using unpaired Student's t-test. \*p < 0.05, \*\*\*p < 0.001. (C) Western  
 886 blot analysis showing the total levels of H3K9ac and H3 in WT and MKR tumors. (D) Gene sets  
 887 enriched in upregulated genes and (E) downregulated genes in Rag/MKR tumors compared to  
 888 Rag/WT tumors. Absolute value of Normalized enrichment score (NES) from Gene Set  
 889 Enrichment Analysis (GSEA) is shown. P < 0.05. (F-I) Gene expression quantification in WT  
 890 and MKR derived tumors using RT-qPCR. Ct values were normalized with housekeeping gene  
 891 18S. Significance was calculated using unpaired Student's t-test. \*p < 0.05, \*\*p < 0.01.
